# Supplementary material
Source: PubMed Central journal article supplement (PMC390313)
Supplement: nar_32_4_e41__1.pdf [file nar_32_4_e41__1.pdf]

**Table S1: Overview of used Hyb-designs and ratio calculations (2<sup>nd</sup> series)**

| <b>Hyb Design</b> | <b>Array</b> | <b>Cy3</b> | <b>Cy5</b> | <b>Unlabelled</b> |
|-------------------|--------------|------------|------------|-------------------|
| <b>SelfSelf</b>   | 13           | A          | A          | -                 |
| <b>ComRef</b>     | 14           | A          | REF        | -                 |
|                   | 15           | REF        | A          | -                 |
| <b>OneColor</b>   | 16           | A          | -          | -                 |
|                   | 17           | -          | A          | -                 |
| <b>Unlabelled</b> | 18           | -          | A          | A                 |

**Table S2: Pearson correlation coefficients of raw Cy3 or Cy5 signal intensities from sample A, hybridised using different designs**

|                    |                   |                   |                 |                 |                   |                   |                    |
|--------------------|-------------------|-------------------|-----------------|-----------------|-------------------|-------------------|--------------------|
| <b>SelfSelf-3</b>  |                   |                   |                 |                 |                   |                   |                    |
| <b>SelfSelf-5</b>  | <b>0.99</b>       |                   |                 |                 |                   |                   |                    |
| <b>ComRef-3</b>    | <b>0.927</b>      | <b>0.915</b>      |                 |                 |                   |                   |                    |
| <b>ComRef-5</b>    | <b>0.904</b>      | <b>0.886</b>      | <b>0.929</b>    |                 |                   |                   |                    |
| <b>OneColor-3</b>  | <b>0.906</b>      | <b>0.880</b>      | <b>0.860</b>    | <b>0.861</b>    |                   |                   |                    |
| <b>OneColor-5</b>  | <b>0.925</b>      | <b>0.895</b>      | <b>0.888</b>    | <b>0.905</b>    | <b>0.959</b>      |                   |                    |
| <b>Unlabeled-5</b> | <b>0.924</b>      | <b>0.911</b>      | <b>0.882</b>    | <b>0.864</b>    | <b>0.939</b>      | <b>0.950</b>      |                    |
|                    | <b>SelfSelf-3</b> | <b>SelfSelf-5</b> | <b>ComRef-3</b> | <b>ComRef-5</b> | <b>OneColor-3</b> | <b>OneColor-5</b> | <b>Unlabeled-5</b> |

Pearson correlation coefficients are coloured according to strength. Dark-grey:  $R > 0.95$ ; Light-grey:  $0.90 < R < 0.95$ ; White:  $R < 0.90$ .

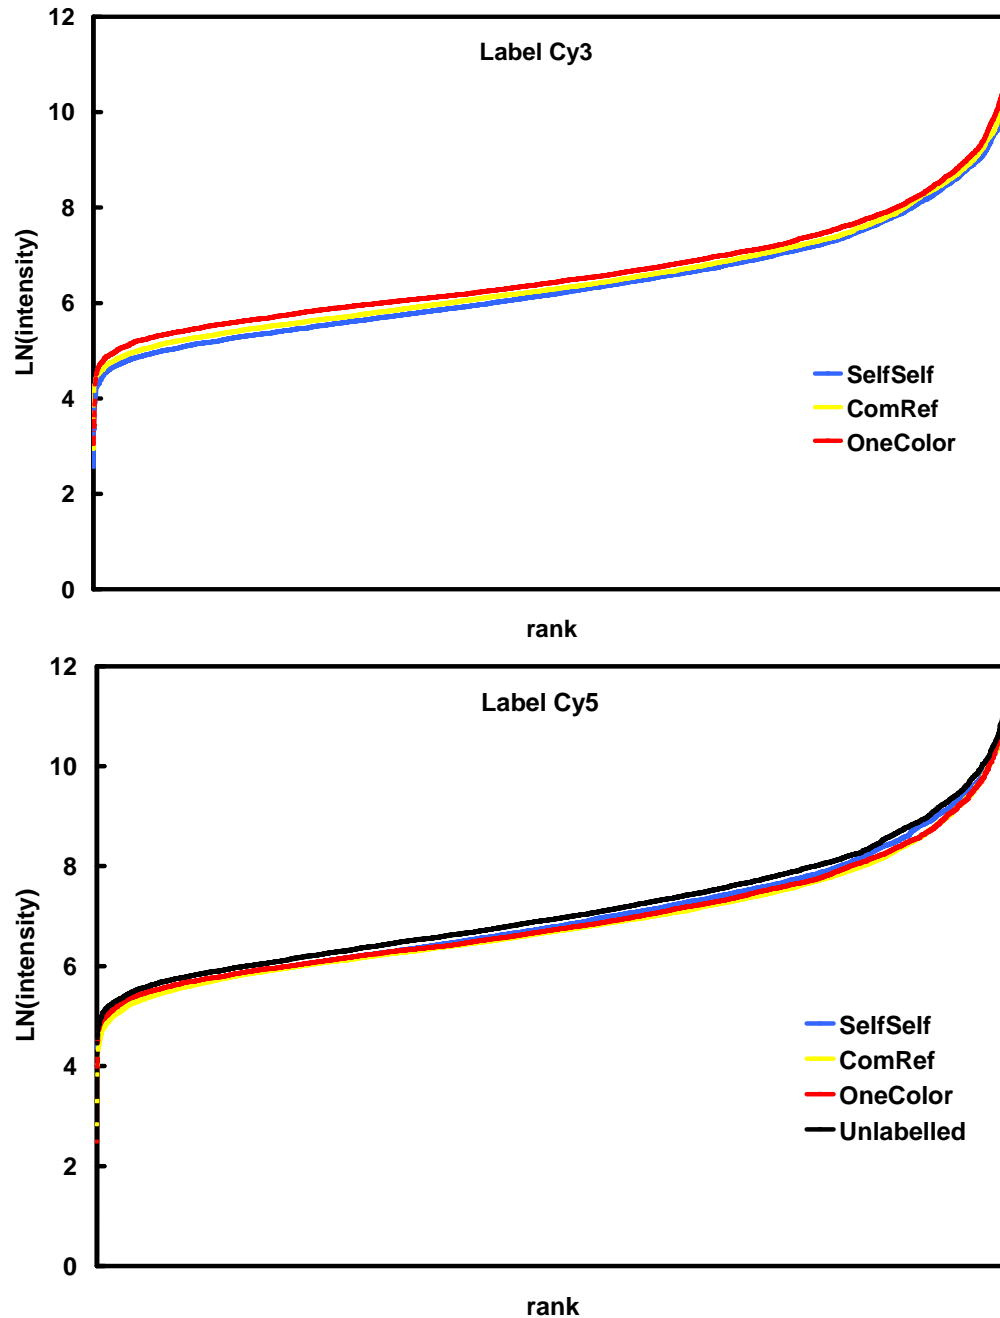

**Figure S1: Effect of hybridisation design on signal intensity distributions.**

The LN-transformed background-corrected Cy3 and Cy5 signal intensities from sample A, observed in a self-self hybridisation (SelfSelf, array 13, blue), hybridisations with the common reference (ComRef, array 14 and 15, yellow), one-colour hybridisations (OneColour, array 16 and 17, red) and hybridisation in presence of unlabelled target (Unlabelled, array 18, black), were ranked in rising order and plotted.
